# Supplementary material for: Trends in the epidemiology of depression and comorbidities from 2000 to 2019 in Belgium
Source: PubMed Central journal article supplement (PMC9241171; doi:10.1186/s12875-022-01769-w), 2022-06-28
Supplement: 12875_2022_1769_MOESM1_ESM.pdf [file 12875_2022_1769_MOESM1_ESM.pdf]

## **APPENDIX**

*Table A1: List of codes used in the chronic disease count.*

| <b>ICPC code</b> | <b>Meaning</b>                         |
|------------------|----------------------------------------|
| A79              | Malignancy NOS                         |
| A90              | Congenital anomaly NOS/multiple        |
| B72              | Hodgkin's disease/lymphoma             |
| B73              | Leukemia                               |
| B74              | Malignant neoplasm blood other         |
| B78              | Hereditary hemolytic anemia            |
| B83              | Purpura/coagulation defect             |
| B90              | HIV-infection/AIDS                     |
| D74              | Malignant neoplasm stomach             |
| D75              | Malignant neoplasm colon/rectum        |
| D76              | Malignant neoplasm pancreas            |
| D77              | Malignant neoplasm digestive other/NOS |
| F83              | Retinopathy                            |
| F84              | Macular degeneration                   |
| F94              | Blindness                              |
| H83              | Otosclerosis                           |
| H84              | Presbycusis                            |
| H86              | Deafness                               |
| K74              | Ischemic heart disease w. angina       |
| K75              | Acute myocardial infarction            |
| K76              | Ischemic heart disease w/o angina      |
| K77              | Heart failure                          |
| K82              | Pulmonary heart disease                |
| K86              | Hypertension uncomplicated             |
| K87              | Hypertension complicated               |
| K90              | Stroke/cerebrovascular accident        |
| K91              | Cerebrovascular disease                |
| K92              | Atherosclerosis/PVD                    |
| K93              | Pulmonary embolism                     |
| K94              | Phlebitis/thrombophlebitis             |
| L84              | Back syndrome w/o radiating pain       |
| L85              | Acquired deformity of spine            |
| L88              | Rheumatoid arthritis                   |
| L89              | Osteoarthritis of hip                  |
| L90              | Osteoarthritis of knee                 |
| L91              | Osteoarthritis other                   |
| L95              | Osteoporosis                           |
| L98              | Acquired deformity of limb             |
| N70              | Poliomyelitis                          |
| N74              | Malignant neoplasm nervous system      |
| N85              | Congenital anomaly neurological        |
| N86              | Multiple sclerosis                     |
| N87              | Parkinsonism                           |
| N88              | Epilepsy                               |
| N89              | Migraine                               |
| N90              | Cluster headache                       |
| N92              | Trigeminal neuralgia                   |

|     |                                                |
|-----|------------------------------------------------|
| P15 | Chronic alcohol abuse                          |
| P28 | Limited function/disability (p)                |
| P70 | Dementia                                       |
| P71 | Organic psychosis other                        |
| P72 | Schizophrenia                                  |
| P73 | Affective psychosis                            |
| P74 | Anxiety disorder/anxiety state                 |
| P75 | Somatization disorder                          |
| P77 | Suicide/suicide attempt                        |
| P79 | Phobia/compulsive disorder                     |
| P80 | Personality disorder                           |
| P85 | Mental retardation                             |
| P98 | Psychosis NOS/other                            |
| R79 | Chronic bronchitis                             |
| R84 | Malignant neoplasm bronchus/lung               |
| R85 | Malignant neoplasm respiratory, other          |
| R95 | Chronic obstructive pulmonary disease          |
| R96 | Asthma                                         |
| S77 | Malignant neoplasm of skin                     |
| S87 | Dermatitis/atopic eczema                       |
| S91 | Psoriasis                                      |
| S97 | Chronic ulcer skin                             |
| T71 | Malignant neoplasm thyroid                     |
| T80 | Congenital anomaly endocrine/metabolic         |
| T85 | Hyperthyroidism/thyrotoxicosis                 |
| T86 | Hypothyroidism/myxedema                        |
| T89 | Diabetes insulin dependent                     |
| T90 | Diabetes non-insulin dependent                 |
| T92 | Gout                                           |
| T93 | Lipid disorder                                 |
| T99 | Endocrine/metabolic/nutritional disorder other |
| U04 | Incontinence urine                             |
| U75 | Malignant neoplasm of kidney                   |
| U76 | Malignant neoplasm of bladder                  |
| U77 | Malignant neoplasm urinary other               |
| U85 | Congenital anomaly urinary tract               |
| U88 | Glomerulonephritis/nephrosclerosis             |
| W72 | Malignant neoplasm related to pregnancy        |
| X75 | Malignant neoplasm cervix                      |
| X76 | Malignant neoplasm breast female               |
| X77 | Malignant neoplasm genital other (f)           |
| Y77 | Malignant neoplasm prostate                    |
| Y78 | Malign neoplasm male genital other             |
| Y85 | Benign prostatic hypertrophy                   |

Table A2: Overview of ATC codes used for medication.

|                              |                                                               |
|------------------------------|---------------------------------------------------------------|
| <b>Total antidepressants</b> | N06A                                                          |
| <i>SSRIs</i>                 | N06AB                                                         |
| <i>SNRI</i>                  | N06AX16, N06AX23, N06AX21, N06AX17                            |
| <i>TCA</i>                   | N06AA                                                         |
| <i>MOAI</i>                  | N06AF, N06AG                                                  |
| <i>Bupropion</i>             | N06AX12                                                       |
| <i>Neuromodulators</i>       | N06AX11, N06AX22, N06AX05, N06AX06, N06AX24, N06AX26, N06AX03 |
| <b>Antipsychotic drugs</b>   | N05A                                                          |
| <b>Anxiolytic drugs</b>      | N05B                                                          |
| <b>Hypnotics</b>             | N05C                                                          |

Table A3: Absolute value reproductions of Tables 1 and 3.

| <b>Table 1</b>           |                  |             |                  |             |
|--------------------------|------------------|-------------|------------------|-------------|
|                          | <i>Year 2000</i> |             | <i>Year 2019</i> |             |
| <b>Prevalence (/100)</b> |                  |             |                  |             |
|                          | Nominator        | Denominator | Nominator        | Denominator |
| Total                    | 5533             | 82782       | 19646            | 210988      |
| Women                    | 3978             | 44161       | 13314            | 113980      |
| Men                      | 1555             | 38621       | 6329             | 96961       |
|                          |                  |             |                  |             |
| 15-29                    | 339              | 18786       | 1724             | 46376       |
| 30-44                    | 1506             | 23916       | 4543             | 51792       |
| 45-59                    | 1813             | 18313       | 6022             | 48410       |
| 60-74                    | 1241             | 14011       | 4820             | 40027       |
| 75+                      | 634              | 7756        | 2537             | 24383       |
| <b>Incidence (/1000)</b> |                  |             |                  |             |
| Total                    | 725              | 77249       | 2567             | 191342      |
| Women                    | 460              | 40183       | 1652             | 100666      |
| Men                      | 265              | 37066       | 914              | 90632       |
|                          |                  |             |                  |             |
| 15-29                    | 136              | 18447       | 608              | 44652       |
| 30-44                    | 239              | 22410       | 787              | 47249       |
| 45-59                    | 197              | 16500       | 631              | 42388       |
| 60-74                    | 98               | 12770       | 327              | 35207       |
| 75+                      | 55               | 7122        | 214              | 21846       |
| <b>Table 3</b>           |                  |             |                  |             |
| <b>Medication (%)</b>    | <i>Year 2000</i> |             | <i>Year 2019</i> |             |
| Total                    | 1463             | 5533        | 7765             | 19335       |
| Women                    | 1065             | 3978        | 5483             | 13081       |
| Men                      | 398              | 1555        | 2282             | 6251        |
|                          |                  |             |                  |             |
| SSRI                     | 880              | 5533        | 4307             | 19335       |
| SNRI                     | 159              | 5533        | 1924             | 19335       |
| TCA                      | 337              | 5533        | 981              | 19335       |
| Neuromodulators          | 311              | 5533        | 2253             | 19335       |
| MAOI                     | 16               | 5533        | 11               | 19335       |
| Bupropion                | 20               | 5533        | 424              | 19335       |
|                          |                  |             |                  |             |
| Antipsychotics           | 403              | 5533        | 1602             | 19335       |
| Anxiolytics              | 1081             | 5533        | 3497             | 19335       |
| Hypnotics and sedatives  | 624              | 5533        | 2856             | 19335       |

Note 1: Male and female patients might not add up to the total, because some patients had no registered gender.

Note 2: The total prevalent patients in 2019 do not correspond between Tables 1 and 3. This is due to a data matching error in some prescriptions for the last three years between our old and new dataset. We did not consider these patients for the medication calculations.

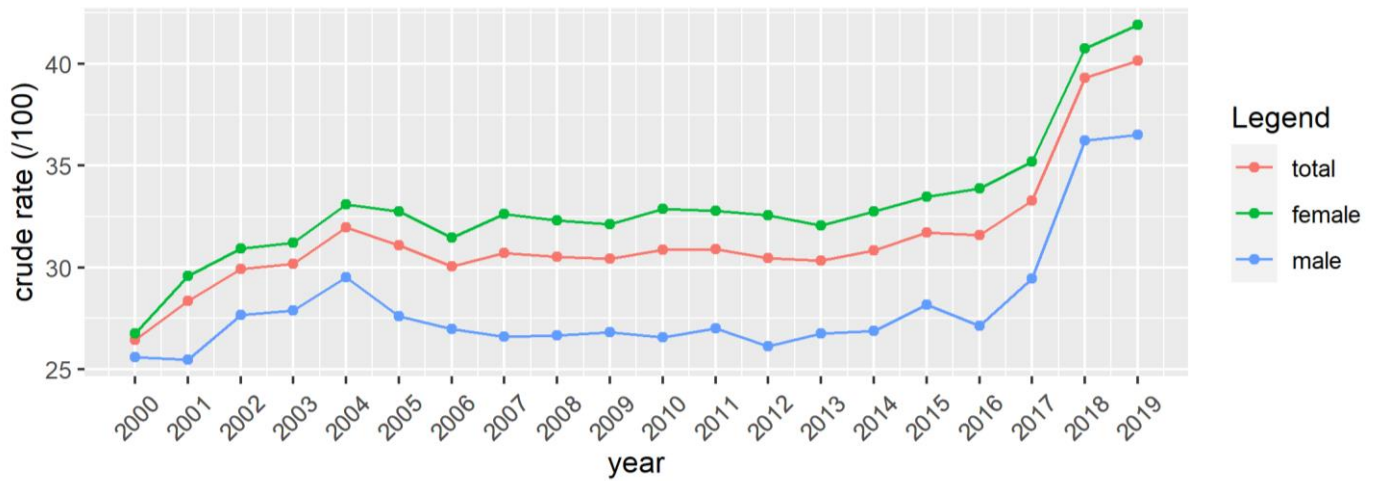

Figure A1. Trends in prescriptions for all antidepressants studied in patients with depression in Flanders, Belgium (2000-2019).

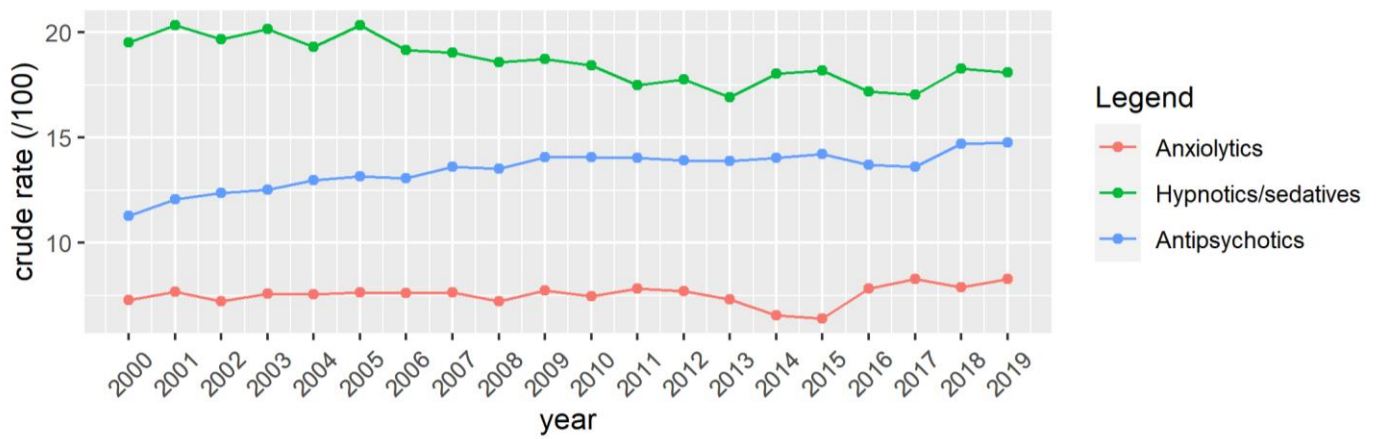

Figure A2. Trends in prescriptions for anxiolytics, hypnotics/sedatives and antipsychotics in patients with depression in Flanders, Belgium (2000-2019).
